# Supplementary material for: Sensitive determination of tannic acid using blue luminescent graphene quantum dots as fluorophore
Source: Royal Society of Chemistry journal article supplement (doi:10.1039/c6ra10889j), 2016-01-01
Supplement: c6ra10889j1.pdf [file c6ra10889j1.pdf]

**Supplementary Information (SI)**

**Sensitive determination of tannic acid using blue luminescent graphene quantum dots as fluorophore**

**B. Sinduja and S. Abraham John\***

Centre for Nanoscience and Nanotechnology  
Department of Chemistry, Gandhigram Rural Institute  
Gandhigram-624 302, Dindigul, Tamilnadu, India  
E-mail : abrajohn@yahoo.co.in

---

\*Corresponding author: Tel: +91 451 245 2371 ; Fax : + 91 451 245 3031

E-mail : abrajohn@yahoo.co.in; s.abrahamjohn@ruraluniv.ac.in

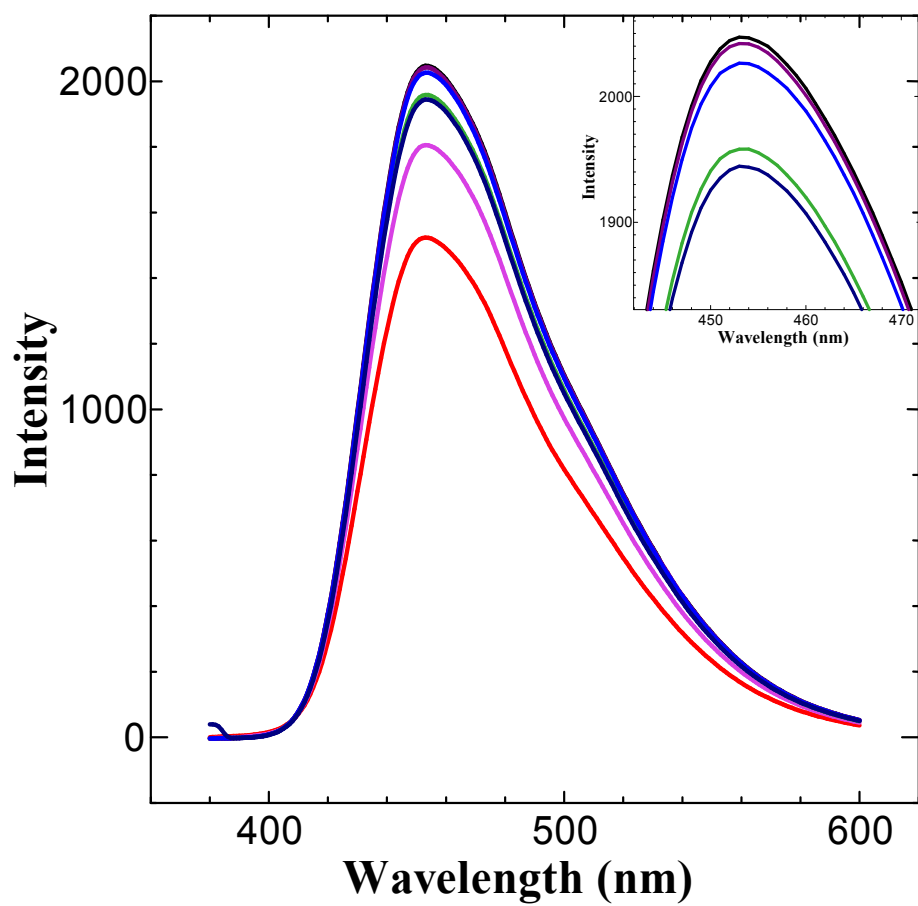

**Figure S1.** Emission spectra of GQDs with various excitation values and maximum emission at 365nm

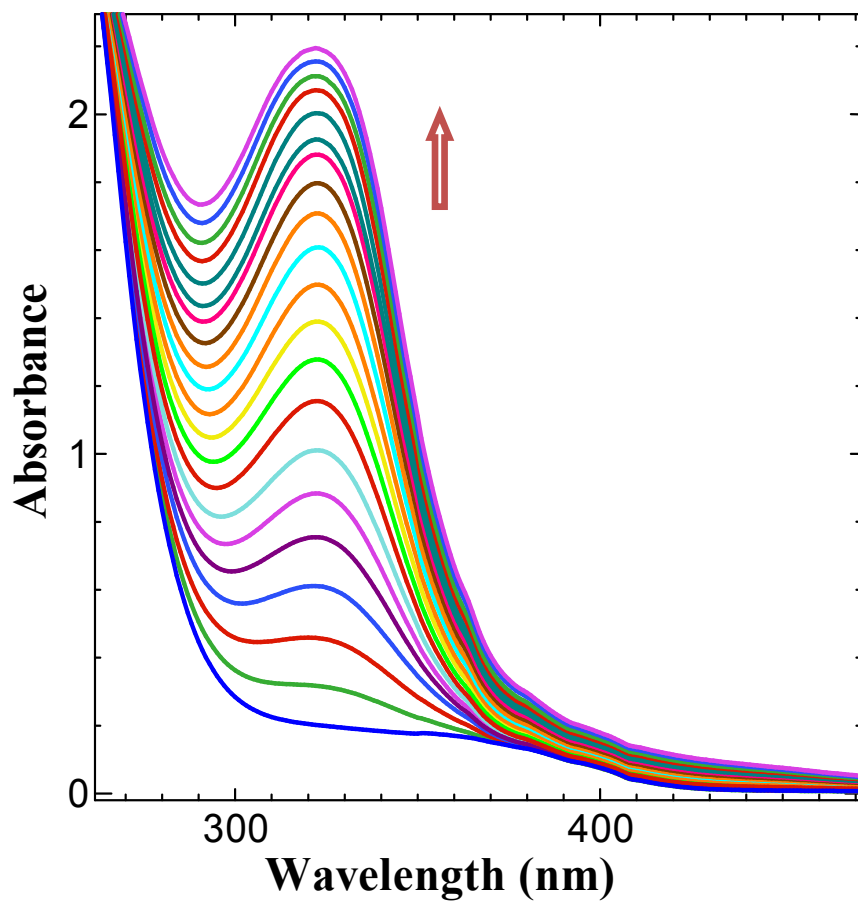

**Figure S2.** UV-vis spectra of GQDs (0.4mg/ml) with various concentration of TA: (a) 0, (b)1, (c) 2, (d) 3, (e) 4, (f) 5, (g) 6, (h) 7, (i) 8, (j) 9, (k) 10, (l) 11, (m) 12, (n) 13, (o) 14, (p) 15, (q) 16 (r)16, (s)17, (t)18, (u)19, (v)20  $\mu$ M

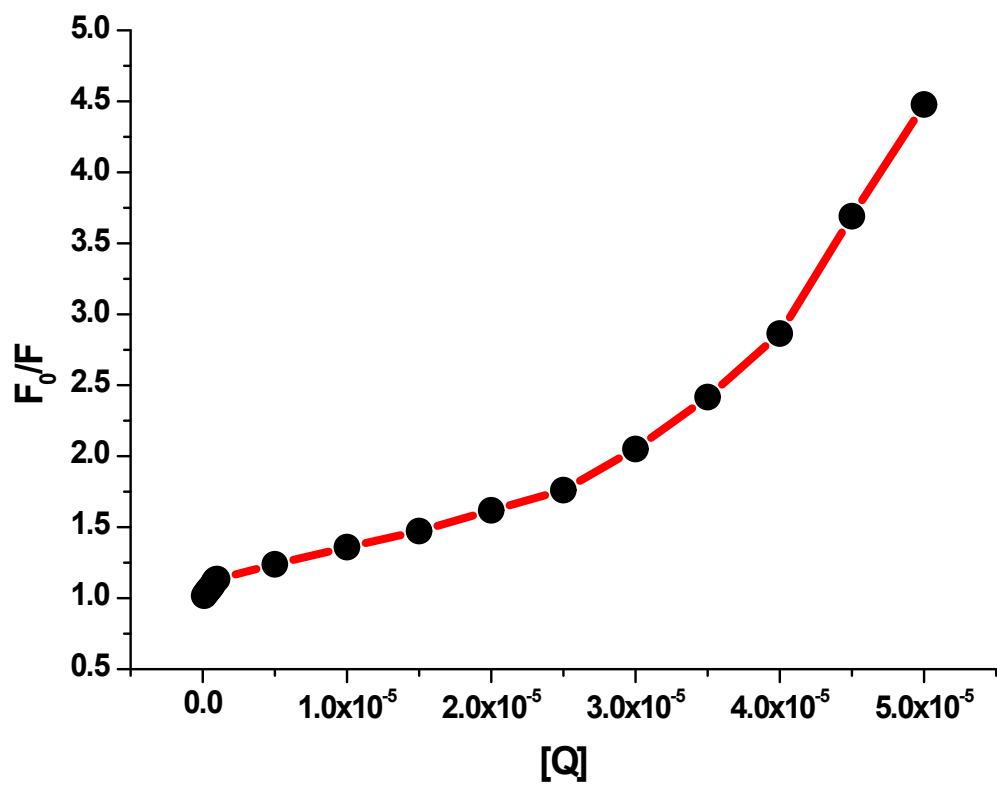

**Figure S3.** Stern-Volmer plot for fluorescence quenching of GQDs in the presence of TA.

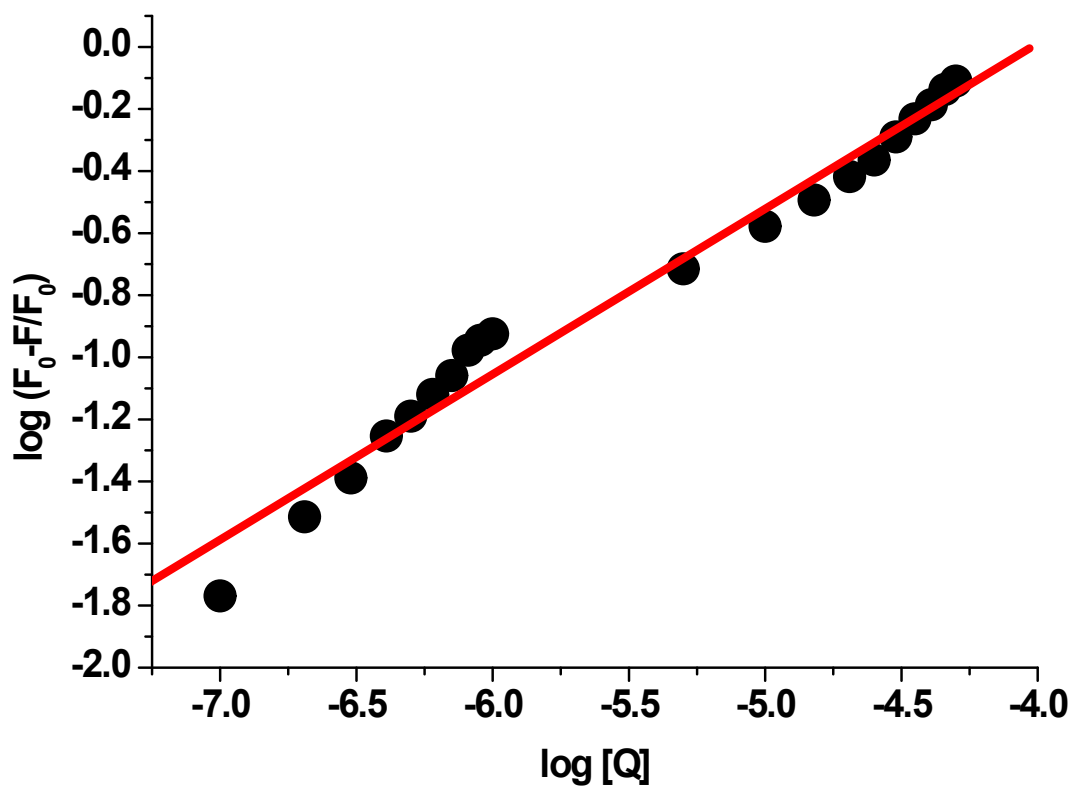

**Figure S4.** Binding constant plot for fluorescence quenching of GQDs in the presence of TA.

**Table S1.**

Determination of TA in beer samples

| Beer added<br>( $\mu\text{L}/2\text{ ml}$ ) | Equivalent TA<br>concentration<br>( $\mu\text{M}$ ) | TA found<br>( $\mu\text{g}/\text{ml}$ ) | TA found in<br>HPLC method<br>( $\mu\text{g}/\text{ml}$ ) |
|---------------------------------------------|-----------------------------------------------------|-----------------------------------------|-----------------------------------------------------------|
| 10                                          | 2.8                                                 | 9.49                                    | 9.12                                                      |
| 20                                          | 4.1                                                 | 9.54                                    | 9.31                                                      |
